# Supplementary material for: Structure elucidation of an aspidofractinine-type monoterpene indole alkaloid from Melodinus reticulatus
Source: publisher site journal article supplement (doi:10.1515/znc-2022-0234), 2023-02-16
Supplement: Supplementary file 1 [file j_znc-2022-0234_suppl.docx]

**Structure Elucidation of an Aspidofractinine-type Monoterpene Indole Alkaloid from *Melodinus reticulatus***

Adrien Jagora,1 Sarah Szwarc,1 Marc Litaudon,2 Vincent Dumontet,2 Jean-François Gallard,2 Mehdi A. Beniddir1 and Pierre Le Pogam1

1 Équipe “Chimie des substances naturelles” BioCIS, CNRS, Université Paris-Saclay, 5 rue J.- B. Clément, 92290 Châtenay-Malabry, France.

2 Institut de Chimie des Substances Naturelles, CNRS, ICSN UPR 2301, Université Paris-Saclay, 91198, Gif-sur-Yvette, France.

Correspondence

Mehdi A. Beniddir, Équipe “Chimie des substances naturelles” BioCIS, CNRS, Université Paris-Saclay, 5 rue J.- B. Clément, 92290 Châtenay-Malabry, France.

Email: mehdi.beniddir@universite-paris-saclay.fr

Pierre Le Pogam, Équipe “Chimie des substances naturelles” BioCIS, CNRS, Université Paris-Saclay, 5 rue J.- B. Clément, 92290 Châtenay-Malabry, France.

Email: pierre.le-pogam-alluard@universite-paris-saclay.fr

**Table of Contents**

| N | Content | Page |
| --- | --- | --- |
| S1 | Mass spectrum of **1** (retention time = 2.92 min) | S-3 |
| S2 | 1H NMR (CD3OD, 600 MHz) spectrum of **1** | S-4 |
| S3 | 13C NMR (CD3OD, 150 MHz) spectrum of **1** | S-5 |
| S4 | COSYNMR (CD3OD, 600 MHz) spectrum of **1** | S-6 |
| S5 | HSQC NMR(CD3OD, 600/150 MHz) spectrum of **1** | S-7 |
| S6 | HMBC NMR (CD3OD, 600/150 MHz) spectrum of **1** | S-8 |
| S7 | ROESY NMR (CD3OD, 600 MHz) spectrum of **1** | S-9 |
| S8 | Cartesian Coordinates of the lowest-energy conformers of the two epimer candidates of **1** | S-10 |

**Figure S1.** Mass spectrum of **1** (retention time = 2.92 min).

S2. 1H NMR (CD3OD, 600 MHz) spectrum of **1**.


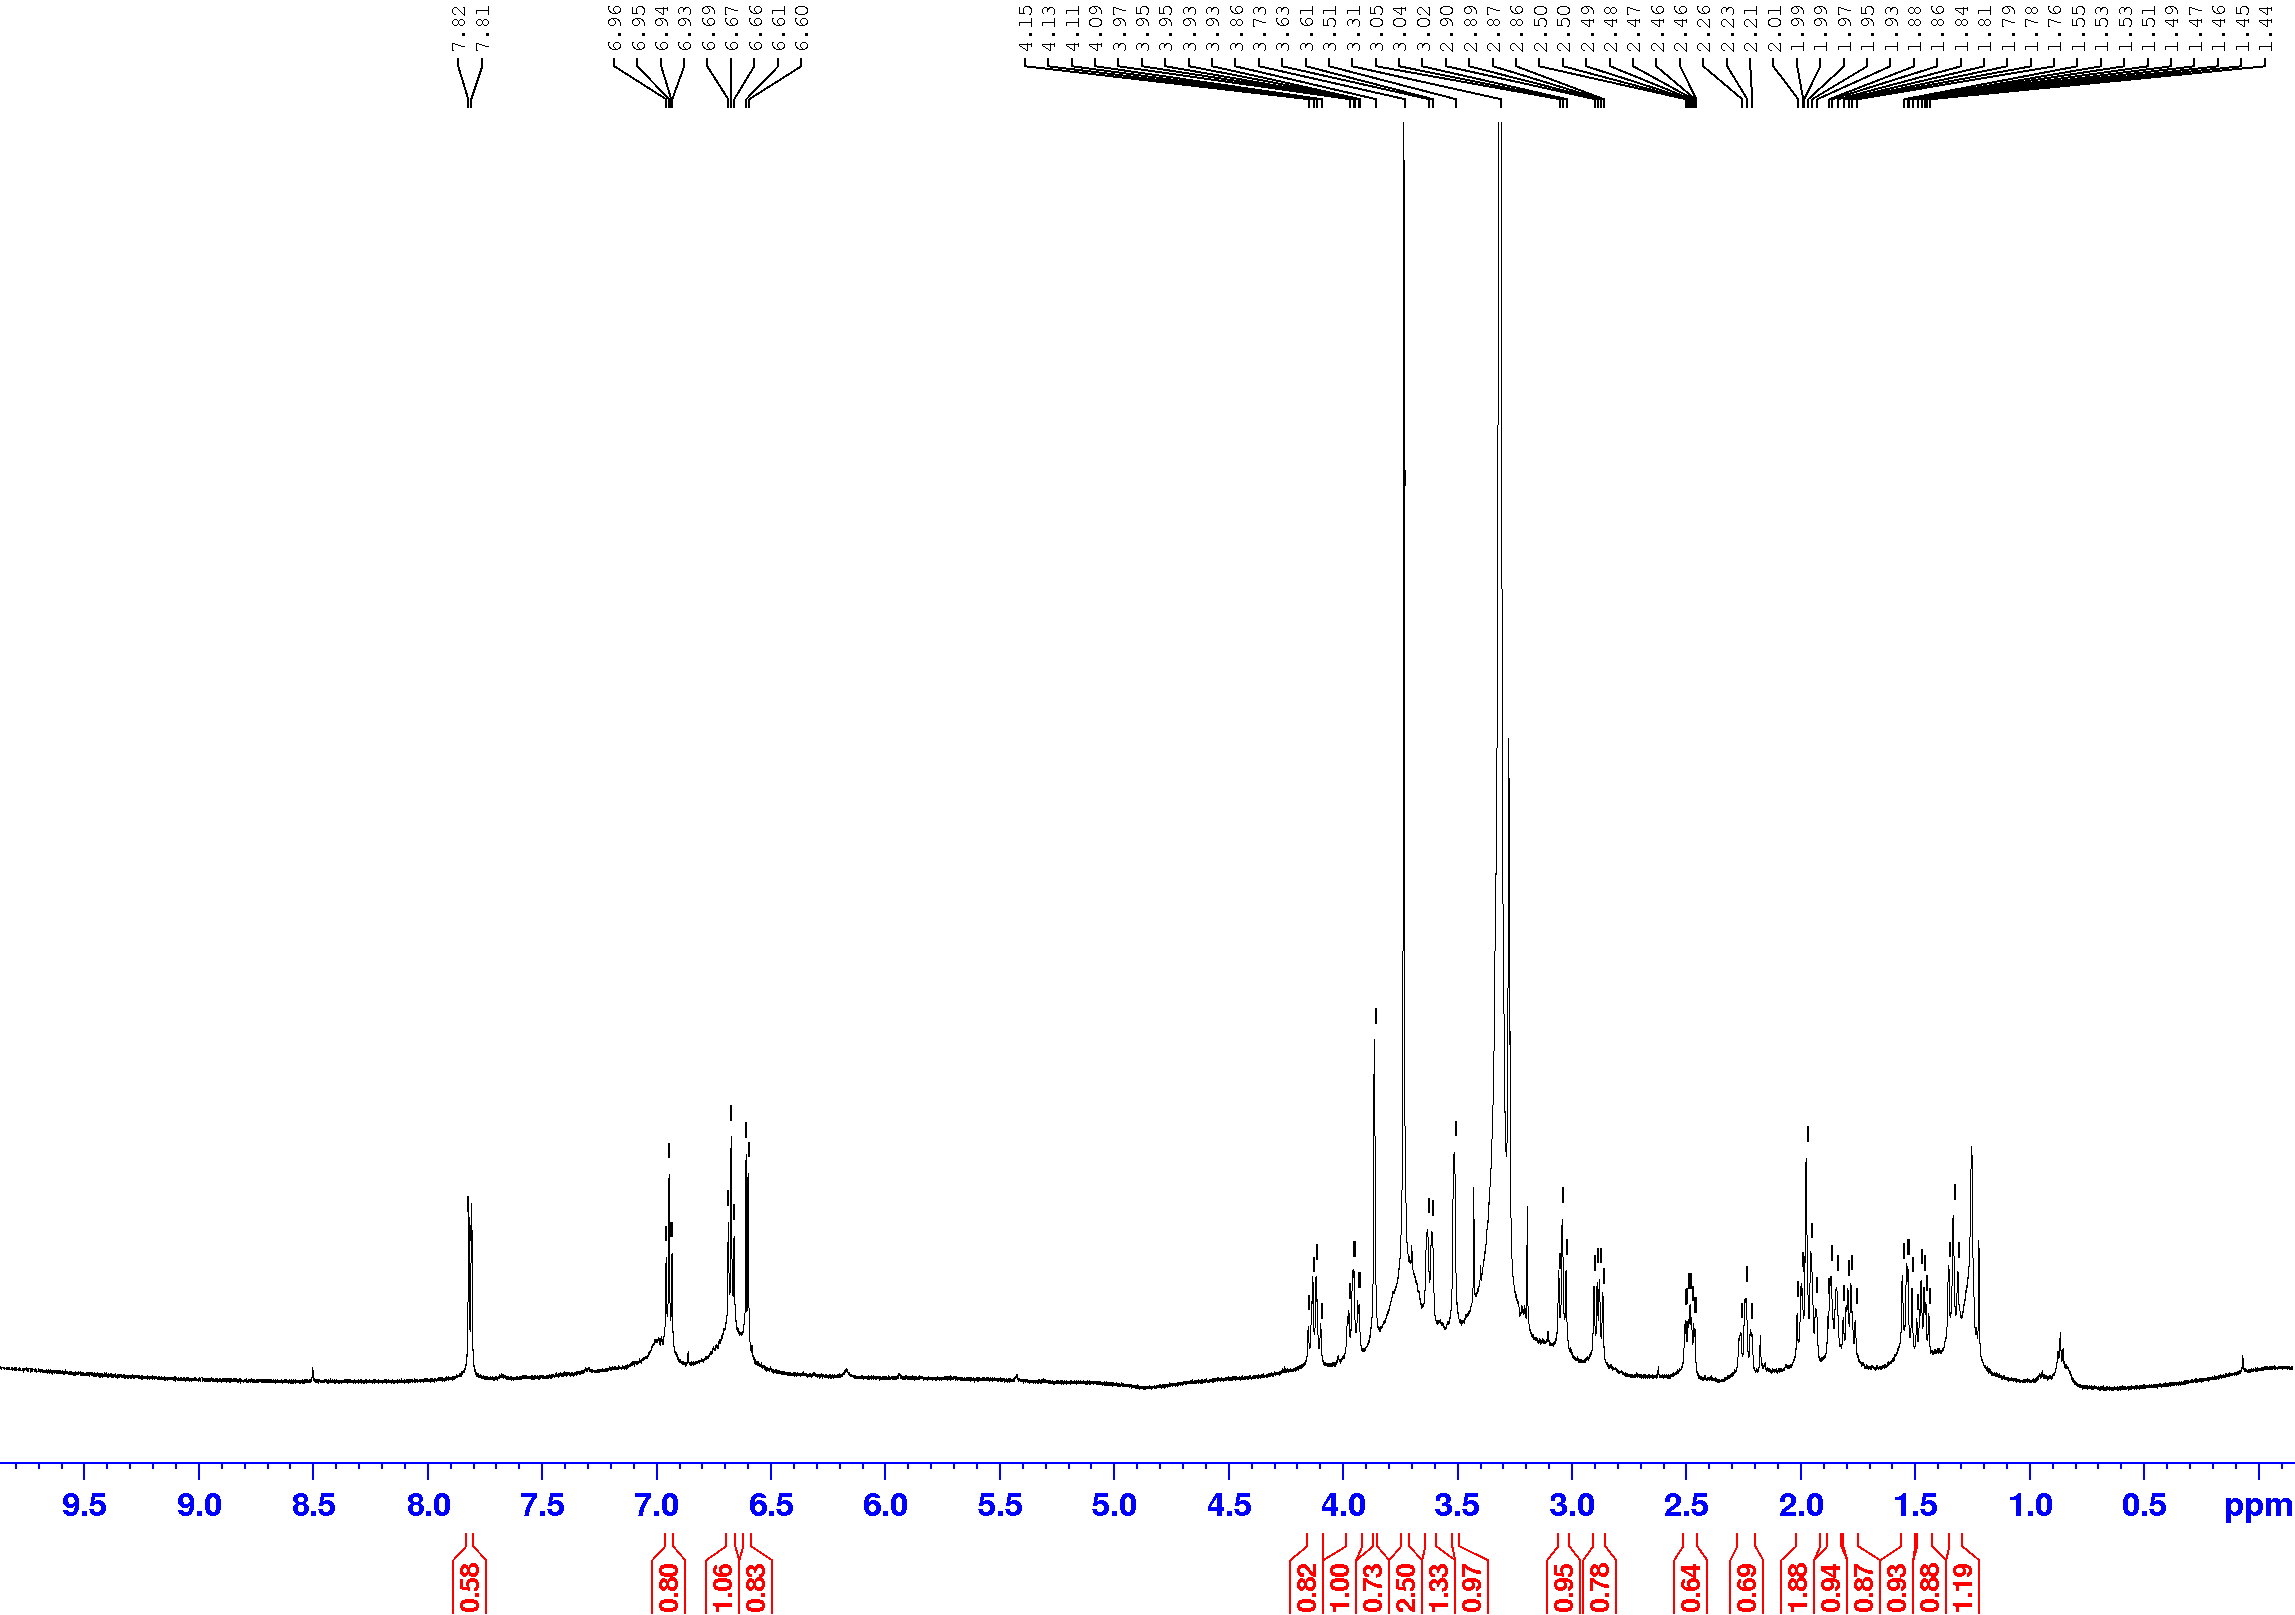


S3. 13C NMR (CD3OD, 150 MHz) spectrum of **1**.


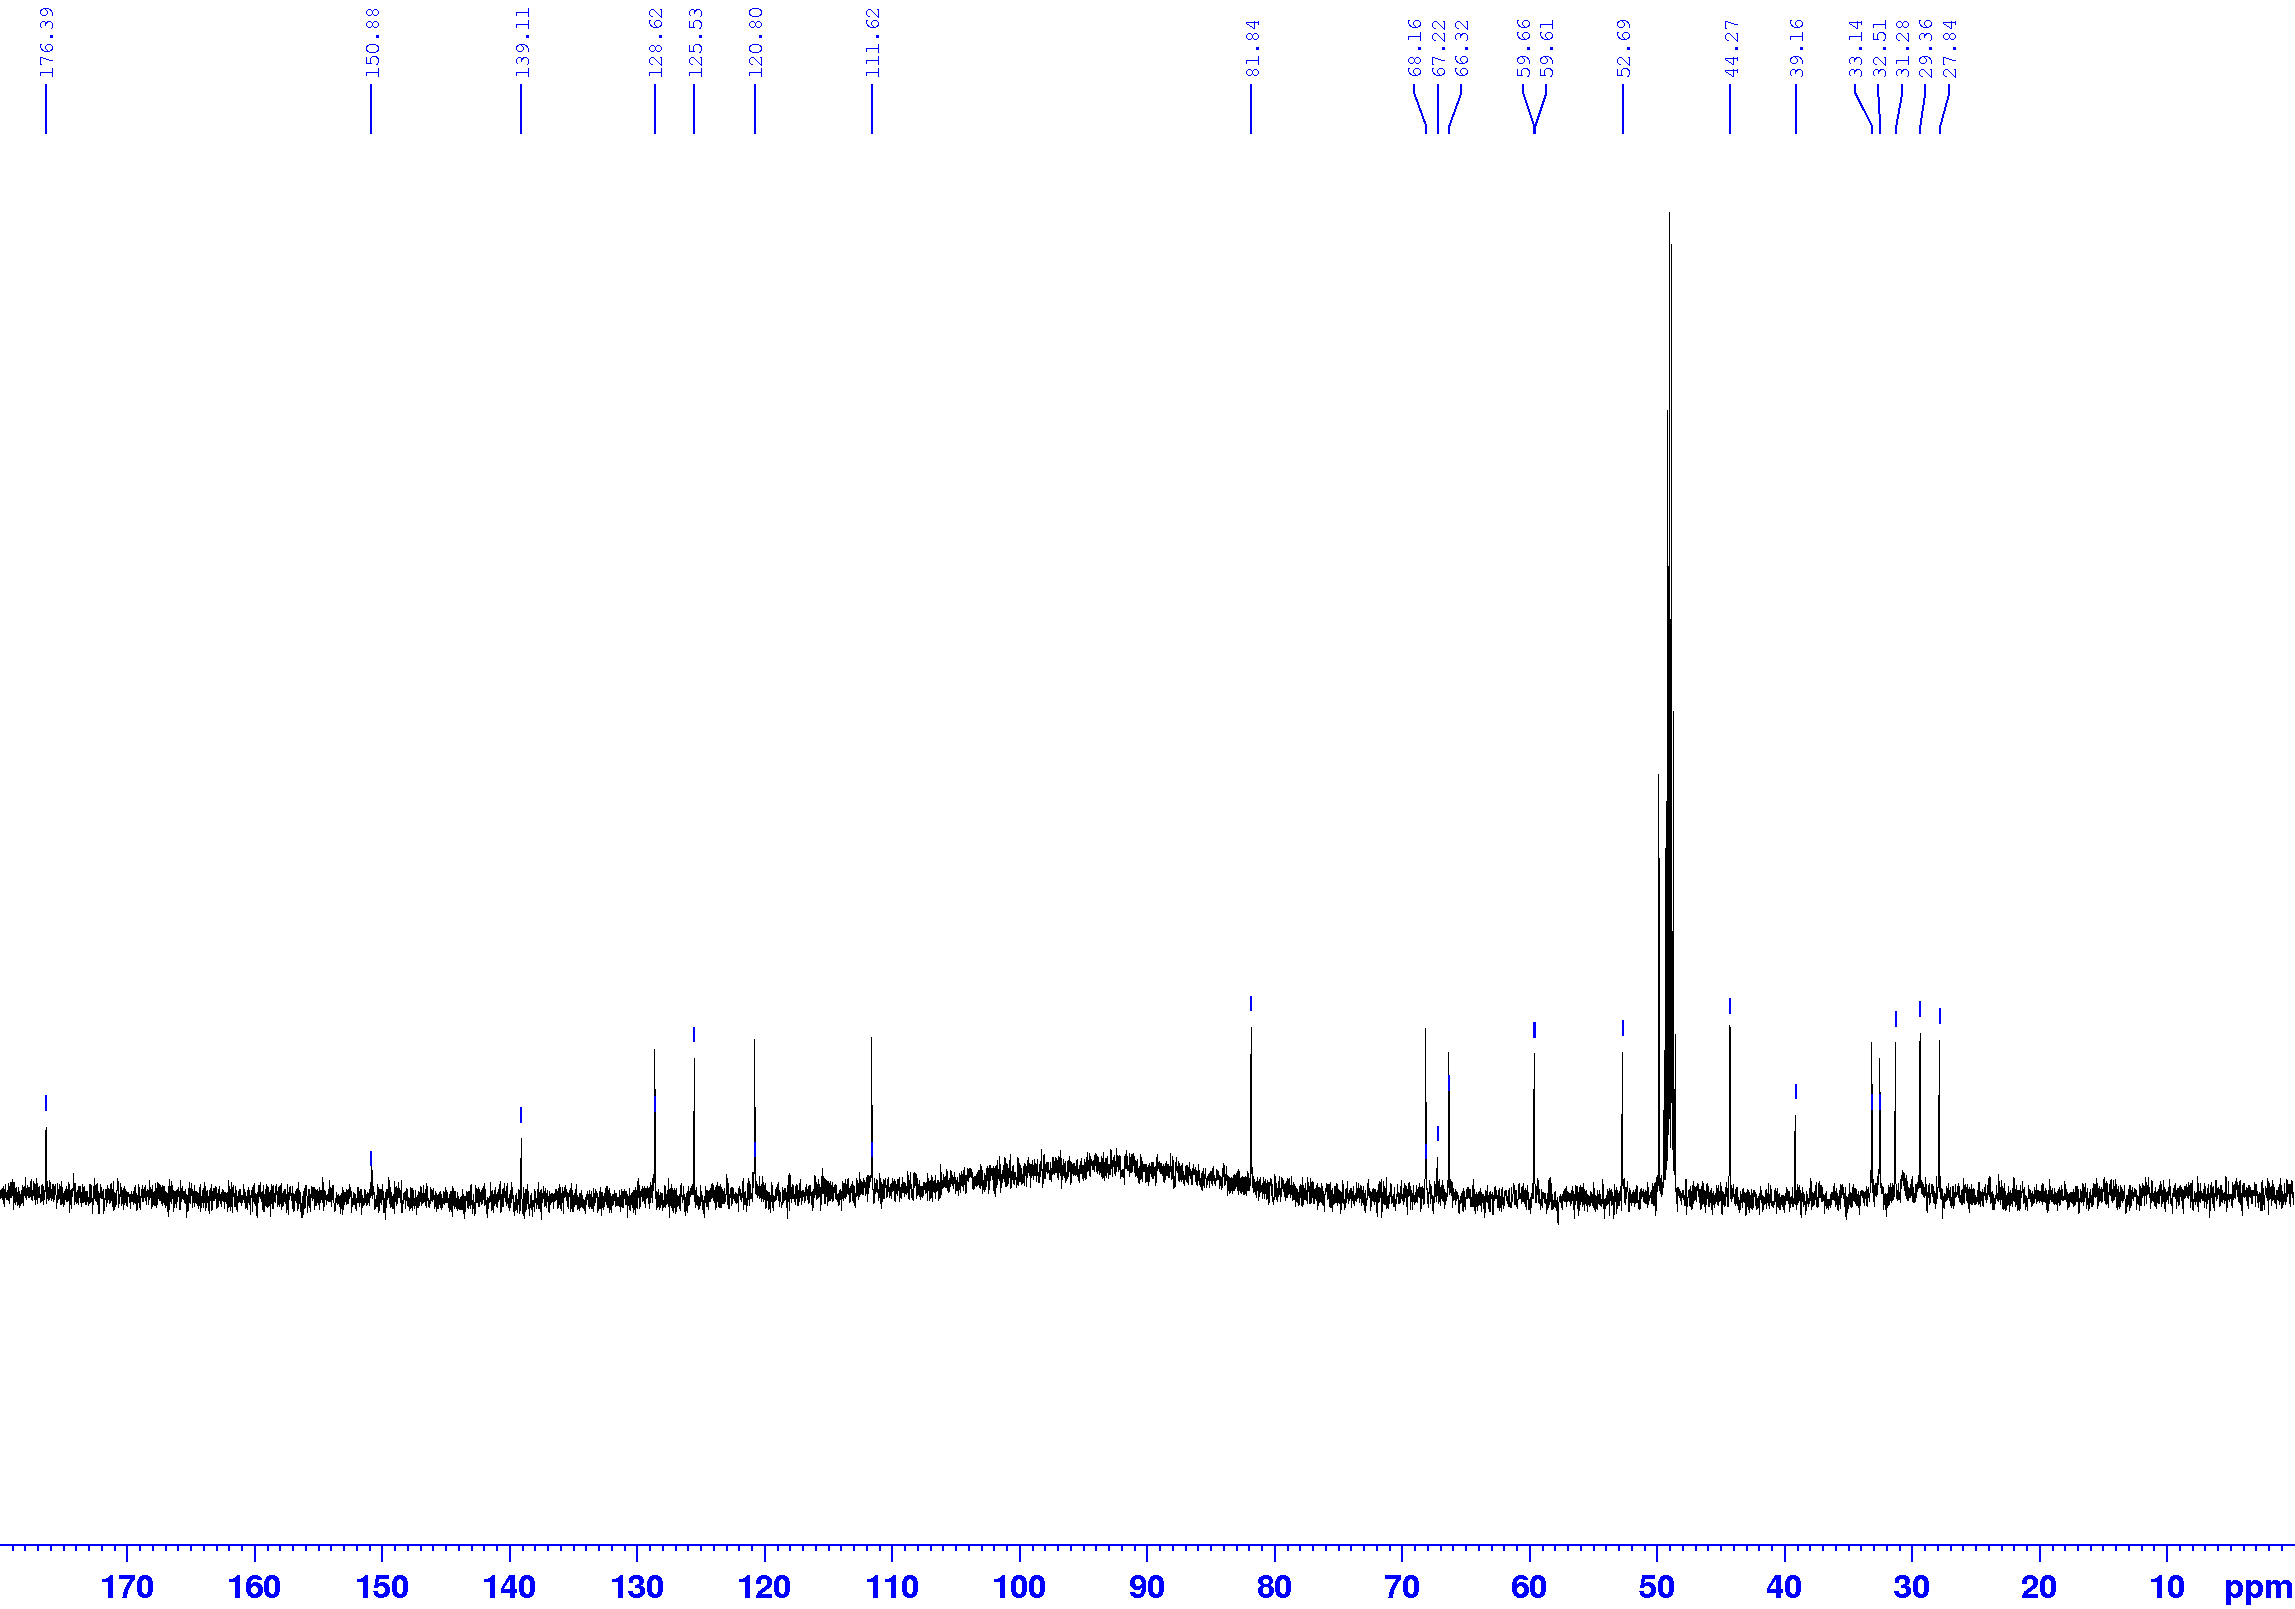


S4.COSY NMR (CD3OD, 600 MHz) spectrum of **1**.


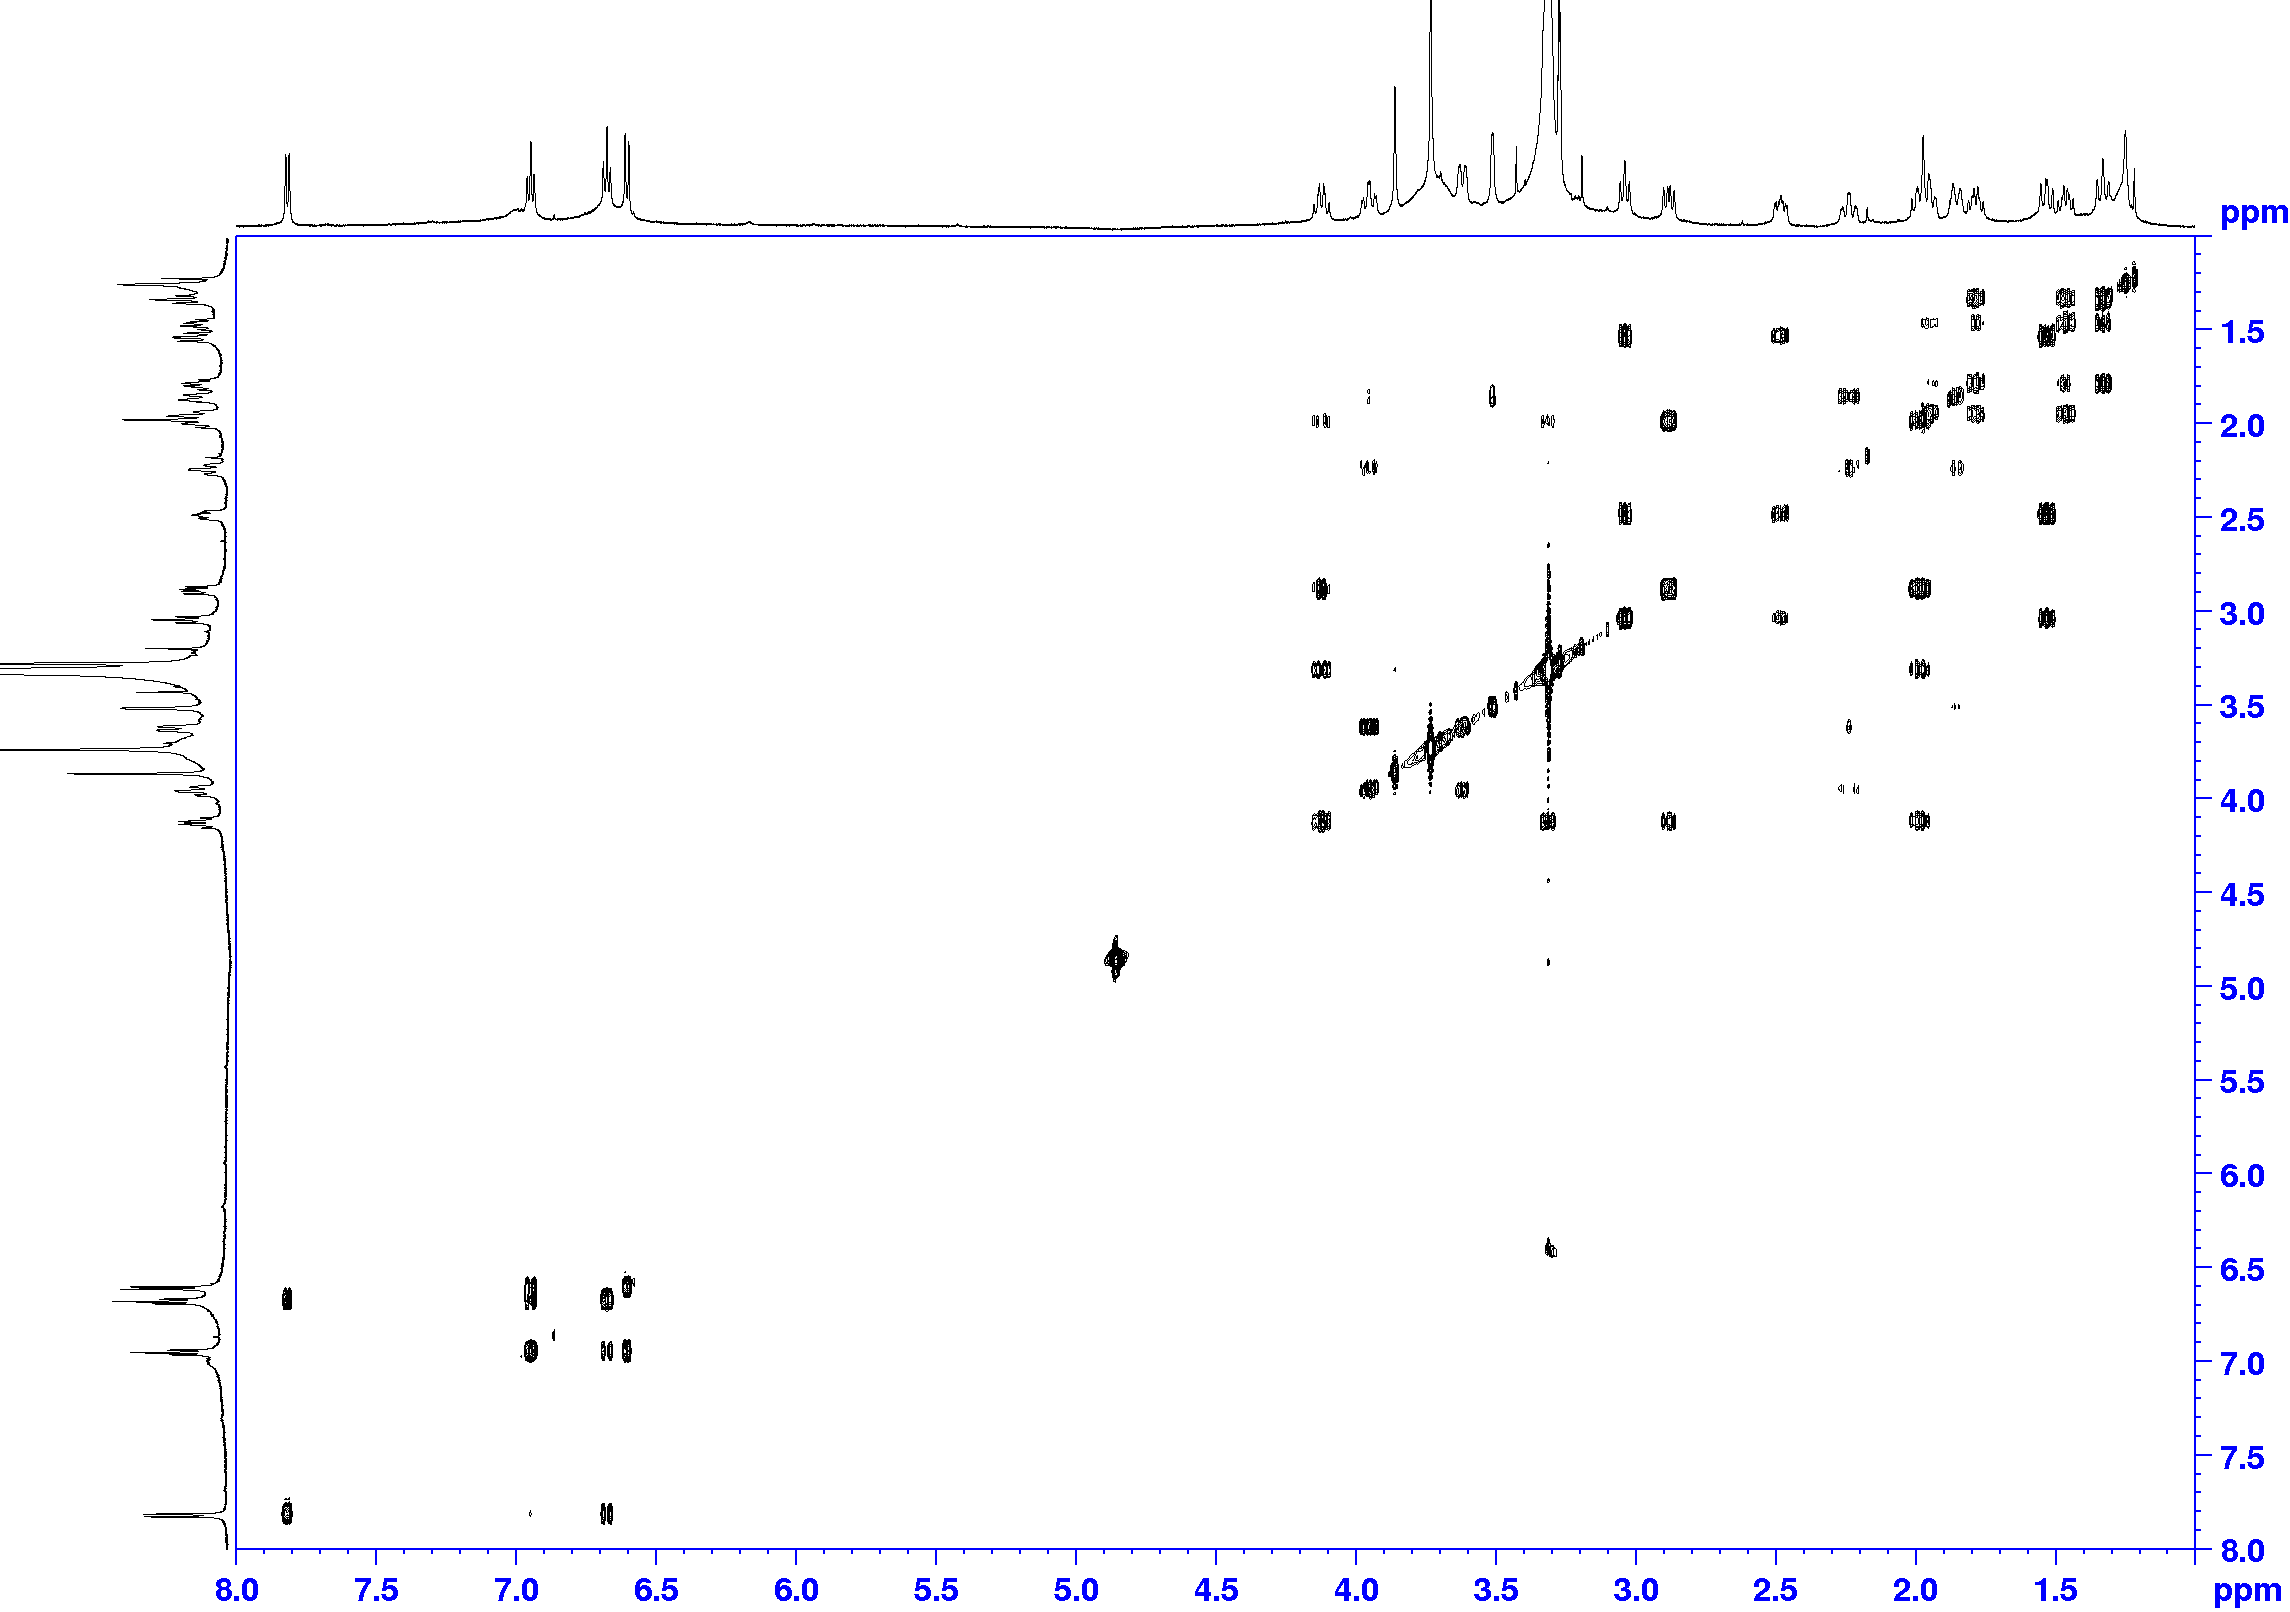


S5.HSQC NMR (CD3OD, 600/150 MHz) spectrum of **1**.


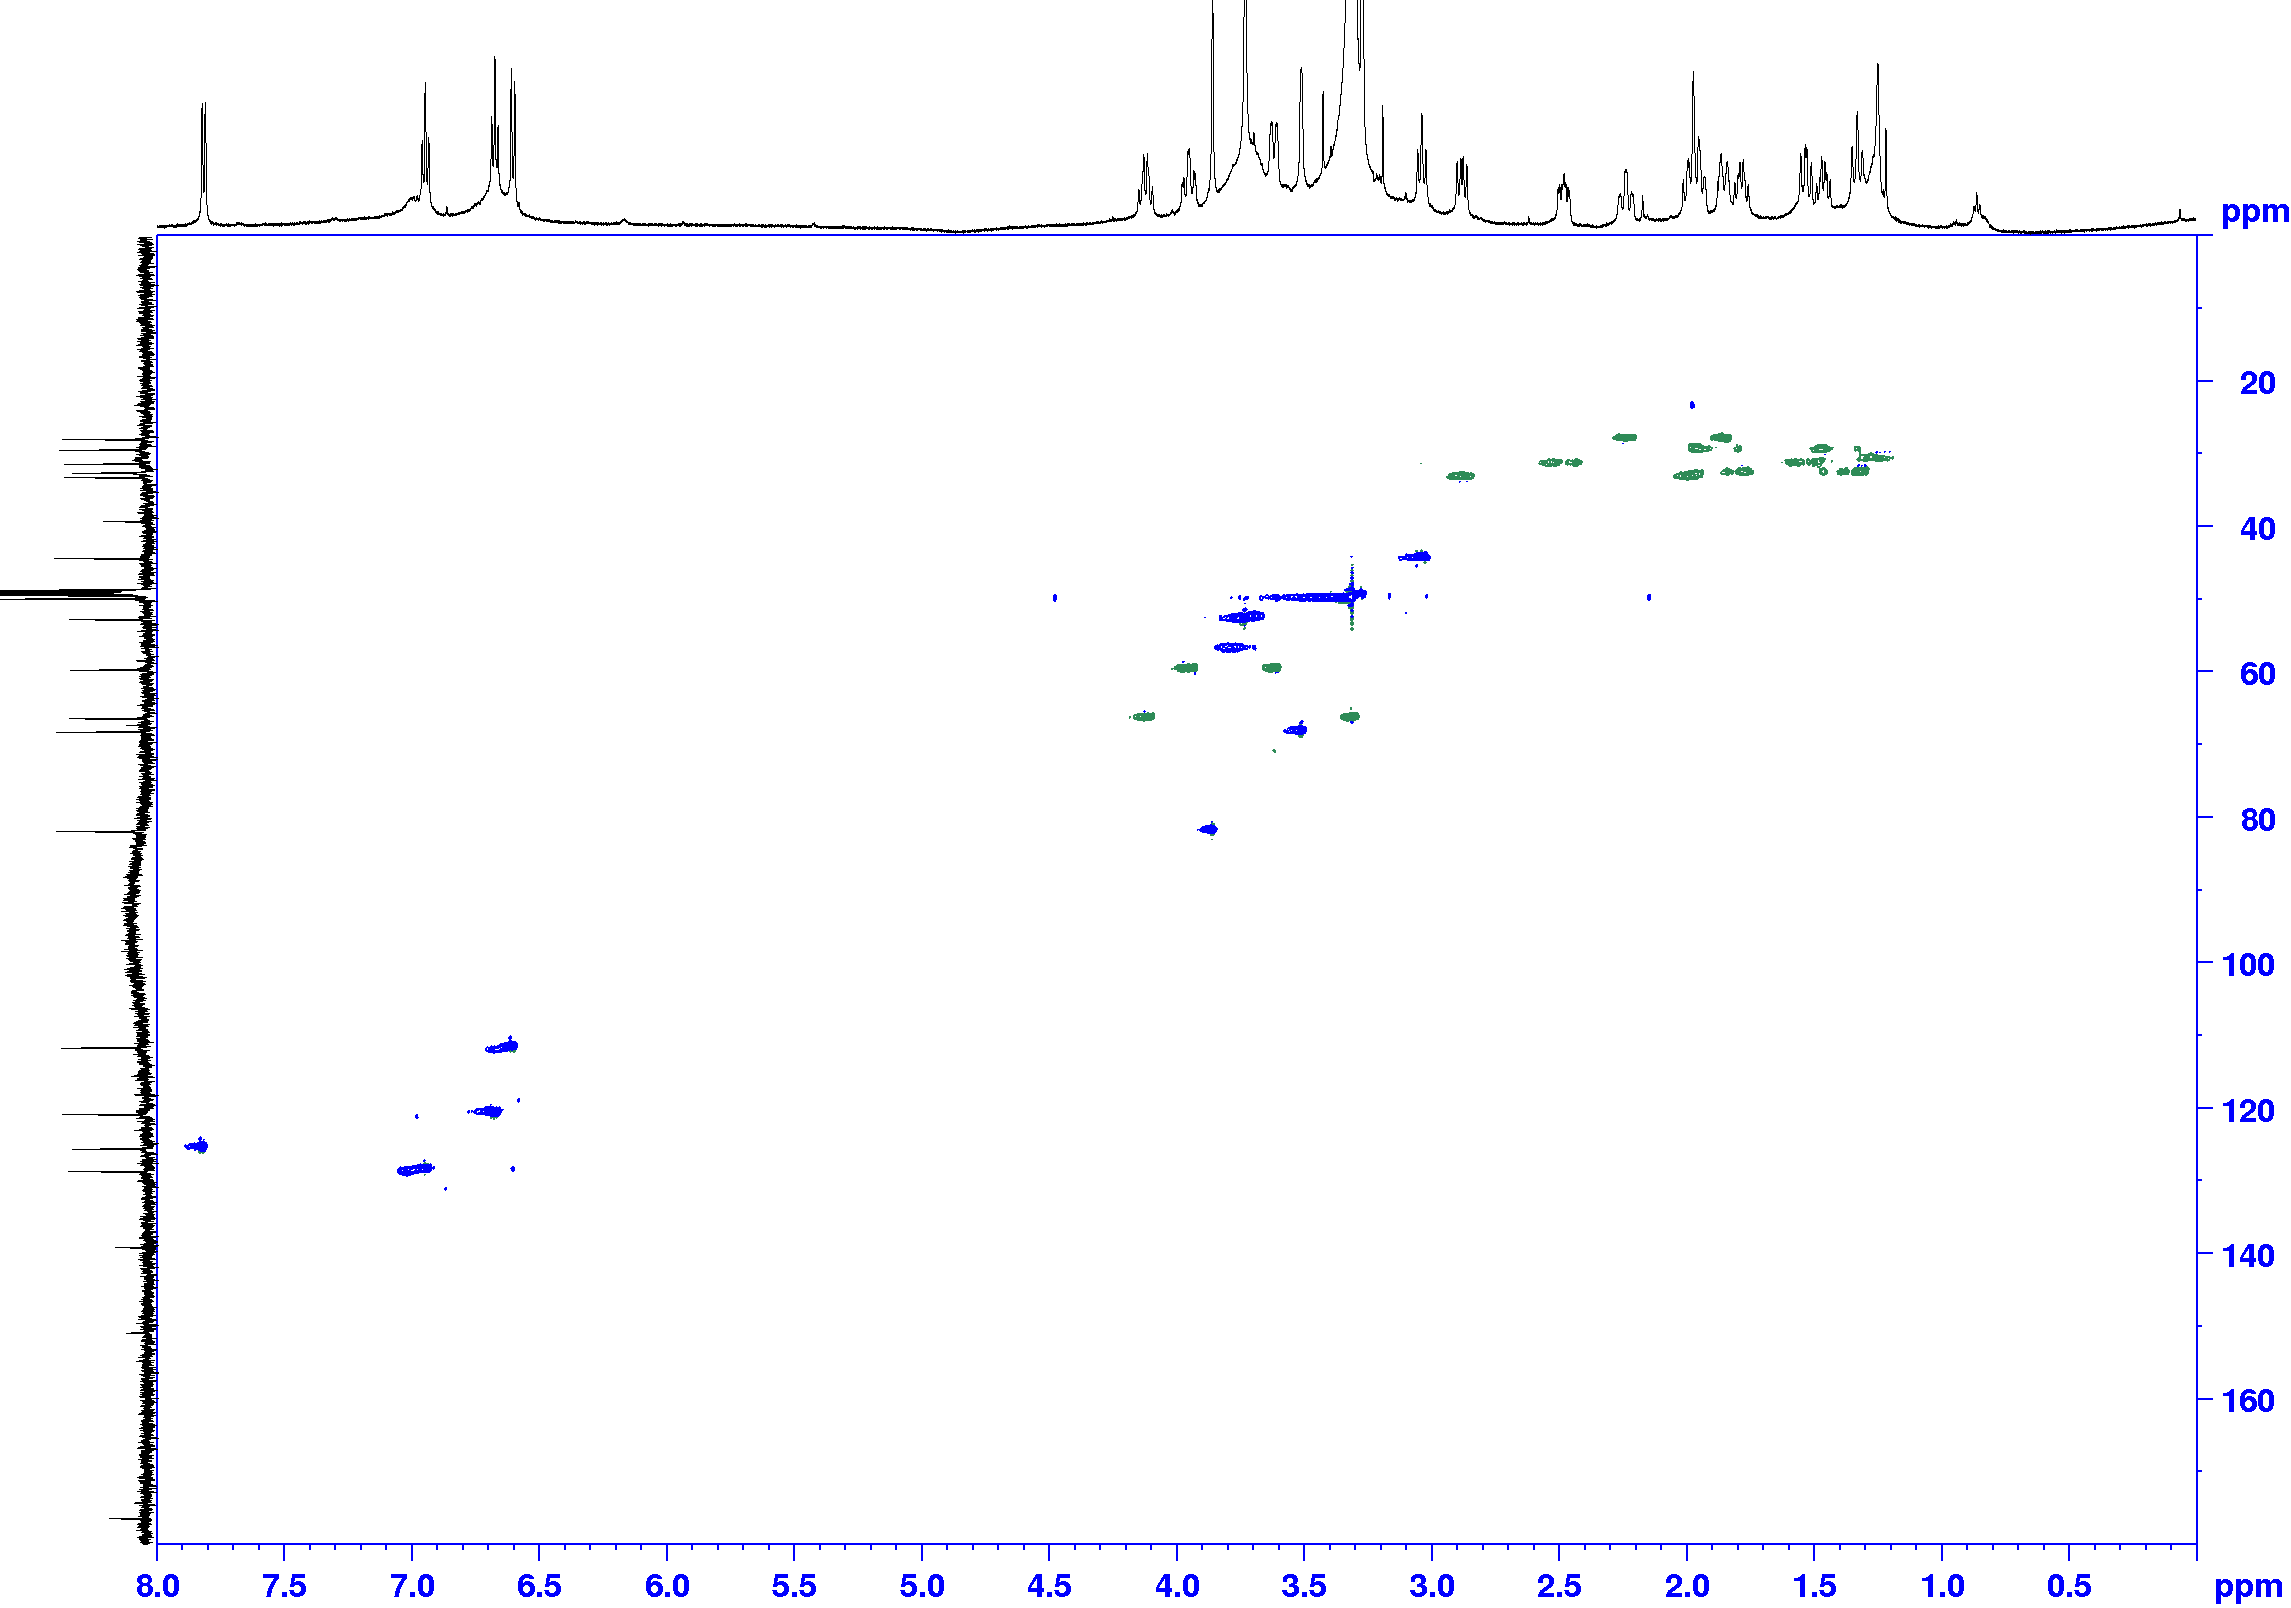


S6. HMBC NMR (CD3OD, 600/150 MHz) spectrum of **1**.


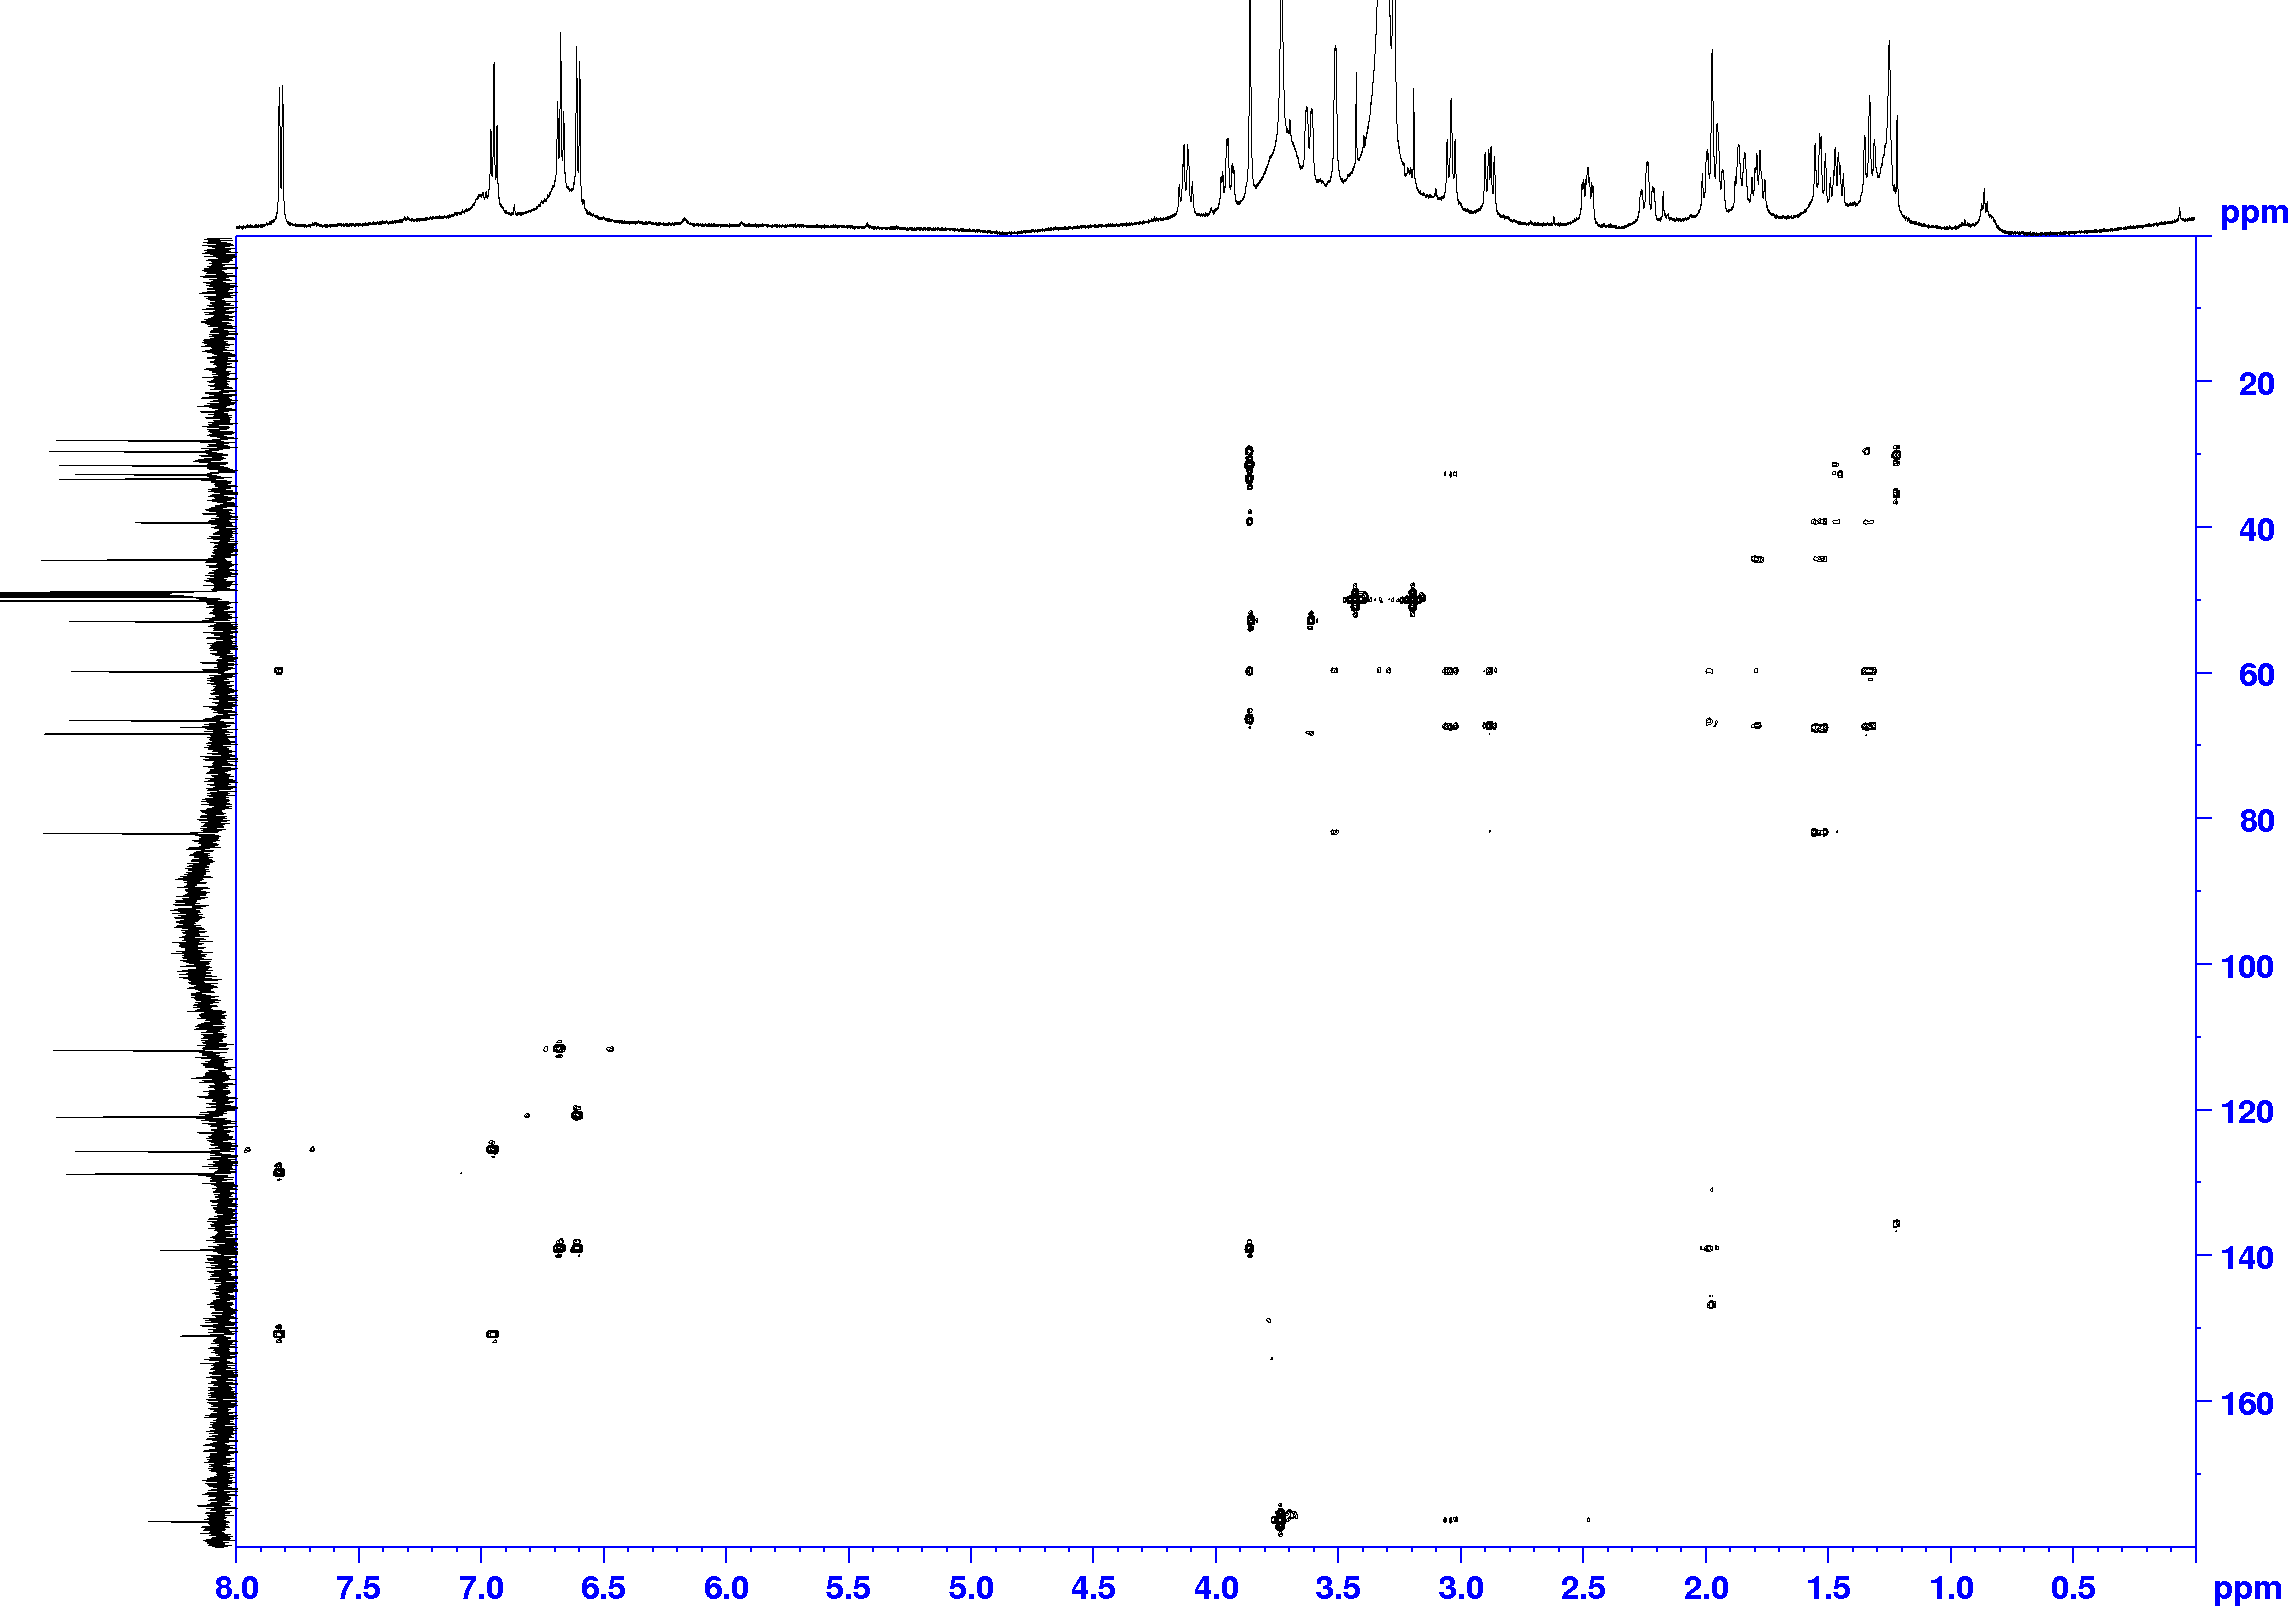


S7. ROESY NMR (CD3OD, 600 MHz) spectrum of **1**.


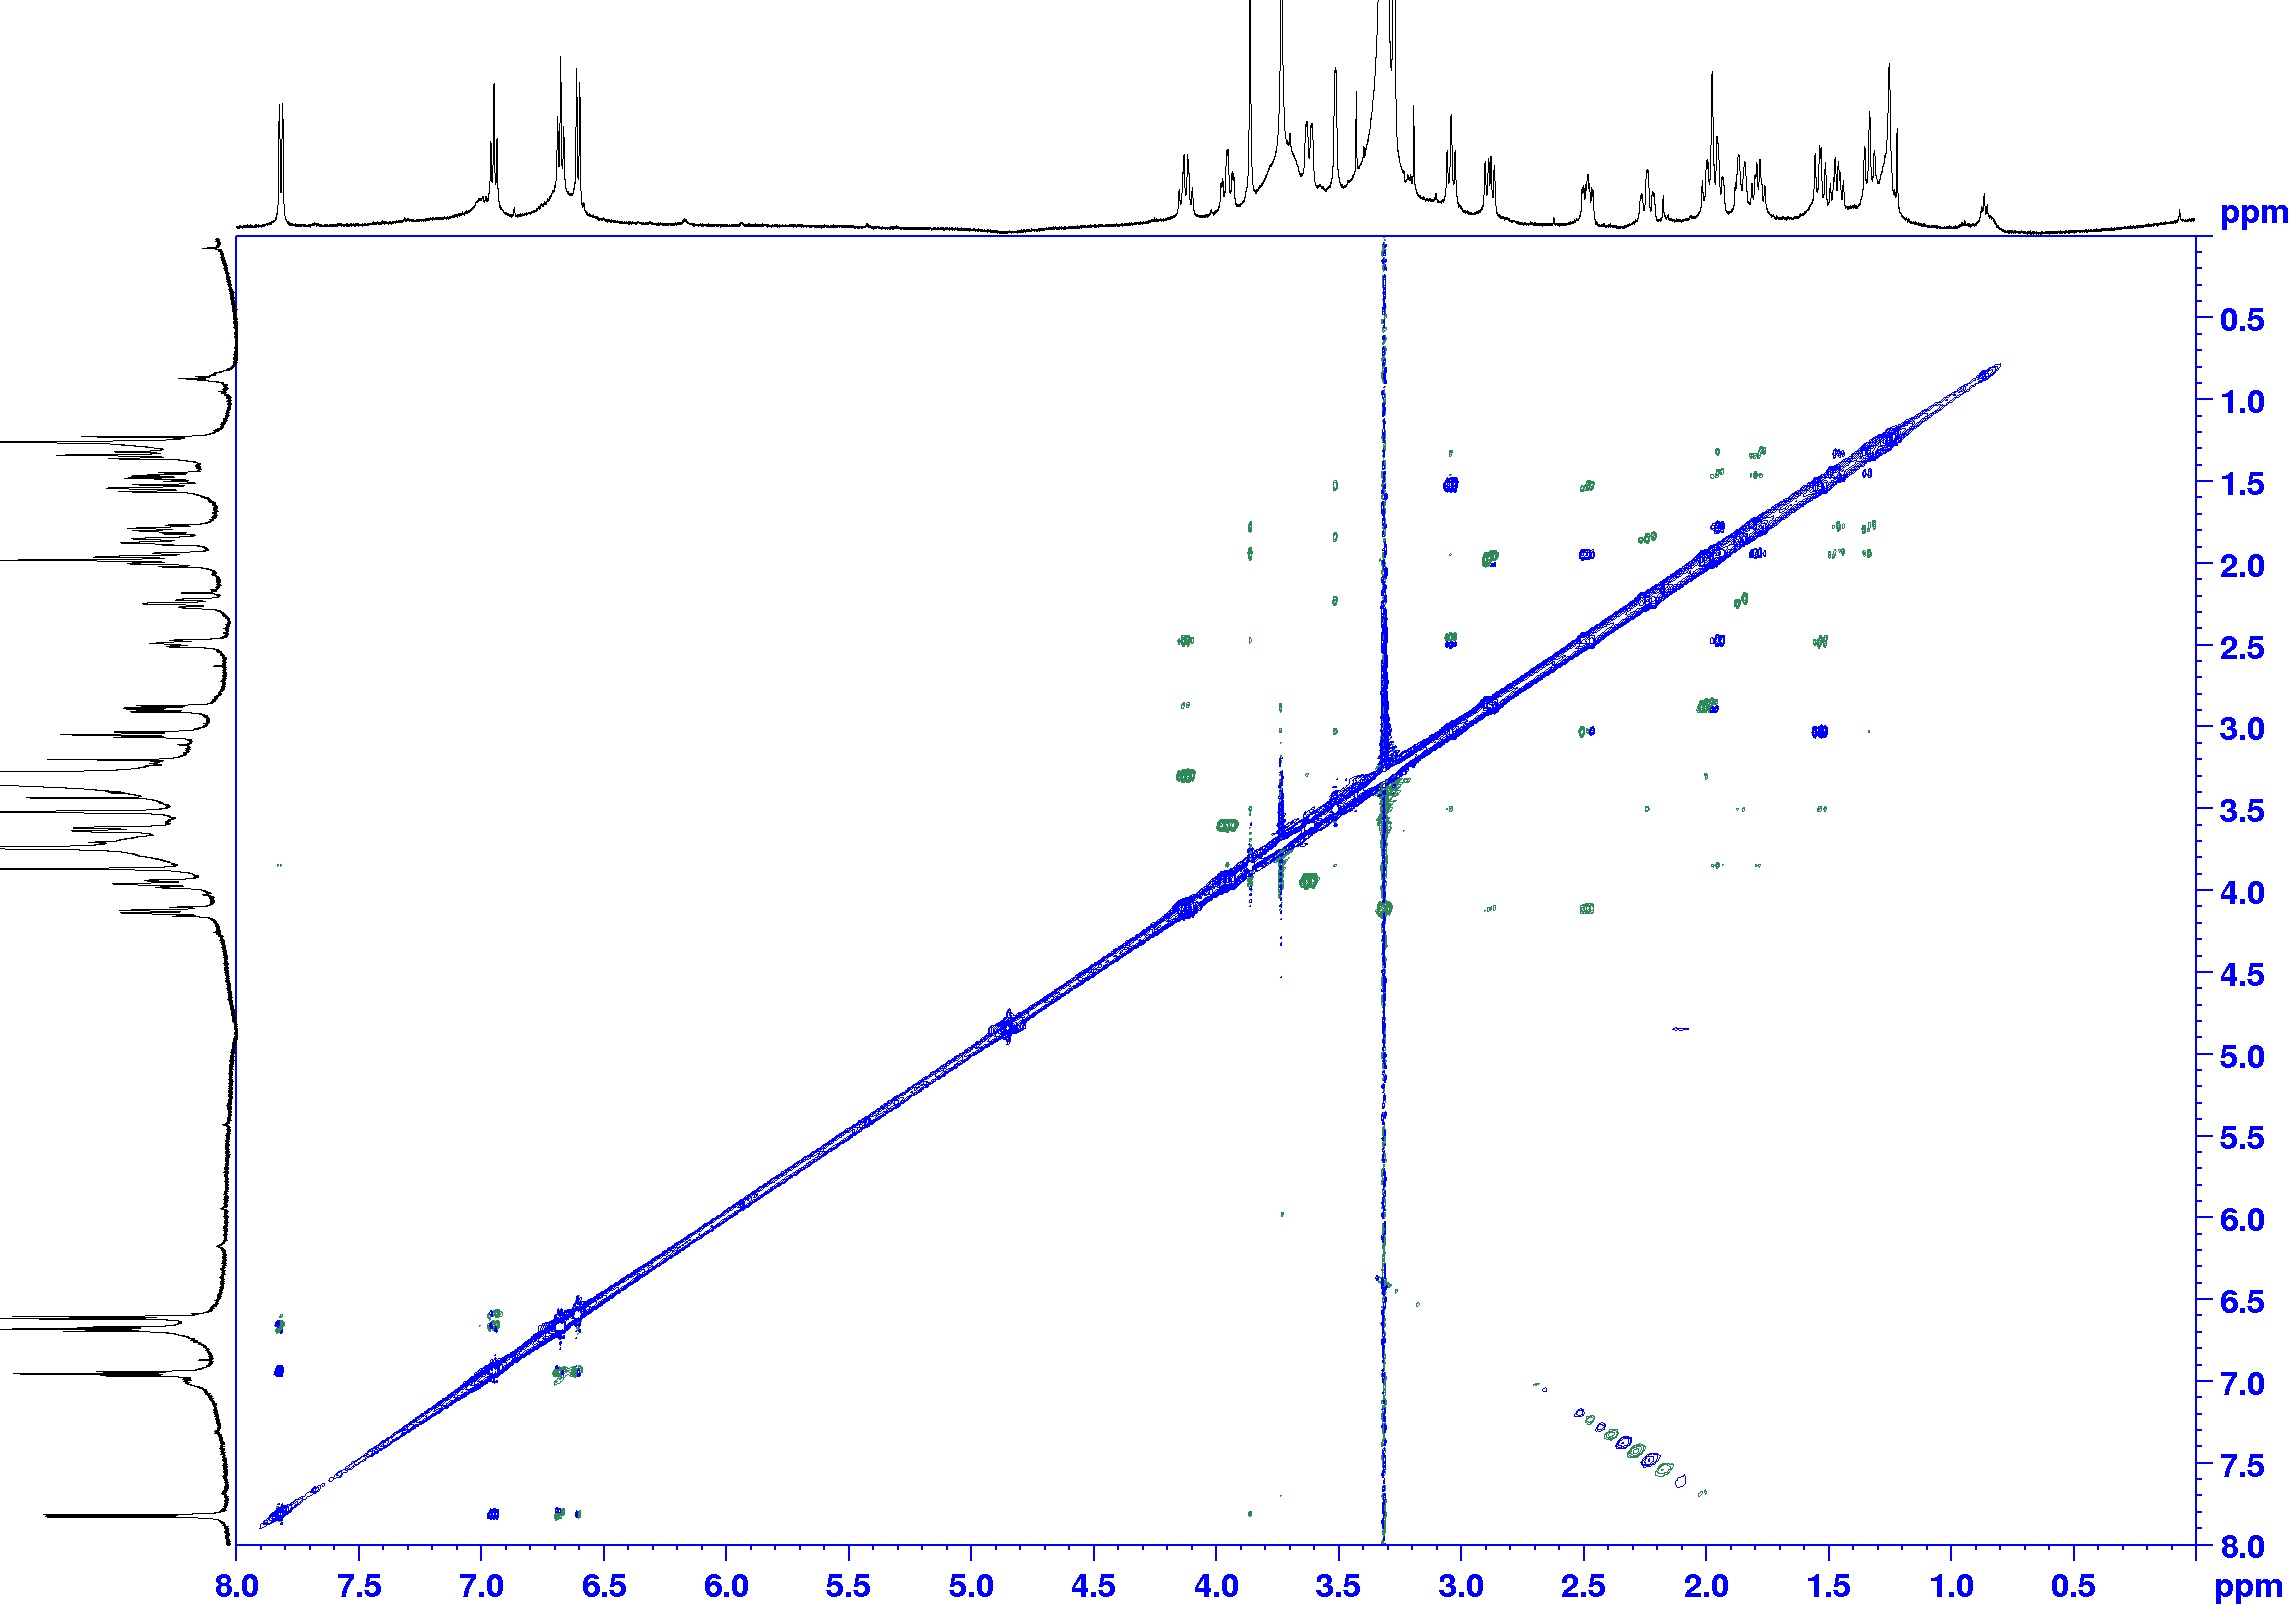


S8. Cartesian coordinates of the lowest-energy conformers of the two epimer candidates of **1**.

Electronic energy (B3LYP): -1226.166964376543 Ha.

Lowest frequency: 41.1051 /cm.

Free enthalpy: -1225.791343 Ha.

Coordinates of the lowest energy conformer of 1 found at the B3LYP/6-31G* level

1 C -1.167406 -3.055602 -0.396417

2 C -2.295758 -3.871442 -0.225395

3 C -3.495701 -3.330474 0.242606

4 C -3.603523 -1.970054 0.559509

5 C -2.474839 -1.170521 0.397373

6 C -1.264067 -1.710311 -0.070062

7 N -2.338267 0.218468 0.627727

8 C -0.276429 -0.561928 -0.238355

9 C -0.897057 0.445561 0.801326

10 H -2.922043 0.601909 1.365578

11 C 1.220583 -0.741024 0.115017

12 C -0.399132 1.908791 0.667230

13 C 1.139486 1.843627 0.472452

14 C 1.714647 0.479590 0.958382

15 C -0.271459 -0.141039 -1.761787

16 C 1.192557 -0.056020 -2.194420

17 N 1.900123 -0.978778 -1.231986

18 C 3.390502 -0.773864 -1.171728

19 C 3.254746 0.536398 0.982951

20 C 3.829582 0.494804 -0.442587

21 O 3.717712 -0.582214 1.743446

22 H 4.687375 -0.561835 1.743800

23 C -1.094611 2.773637 -0.373805

24 O -0.668862 3.065126 -1.473339

25 O -2.270340 3.229728 0.105790

26 C -3.049710 4.017169 -0.810581

27 H -2.491072 4.901075 -1.128722

28 H -3.945160 4.305557 -0.259464

29 H -3.314615 3.425044 -1.690324

30 C -0.409164 0.007676 2.217985

31 C 1.115263 0.246273 2.367605

32 O 1.651926 -2.264165 -1.625472

33 H -0.225171 -3.435099 -0.780898

34 H -2.236601 -4.930067 -0.462873

35 H -4.364058 -3.972614 0.368638

36 H -4.539432 -1.555301 0.926047

37 H 1.434734 -1.660941 0.658096

38 H -0.630246 2.395430 1.622249

39 H 1.614716 2.643264 1.053560

40 H 1.366894 2.051835 -0.573218

41 H -0.793688 0.794451 -1.951169

42 H -0.767650- 0.928075 -2.328212

43 H 1.595638 0.958449 -2.134719

44 H 1.386124 -0.470811 -3.182946

45 H 3.738030 -0.814707 -2.206483

46 H 3.746202 -1.666527 -0.657180

47 H 3.562756 1.472242 1.477124

48 H 3.541124 1.398883 -0.991838

49 H 4.928009 0.507443 -0.398774

50 H -0.971869 0.573287 2.971505

51 H -0.652289 -1.048359 2.363828

52 H 1.320523 1.126012 2.991199

53 H 1.604232 -0.603667 2.847835

Electronic energy (B3LYP): -1226.1501104065426 Ha.

Lowest frequency: 27.9967 /cm.

Free enthalpy: -1225.7726 Ha.

Coordinates of the lowest energy conformer of the *N*-oxide epimer of 1 found at the B3LYP/6-31G* level

1 C -2.823010 -1.814400 -0.590550

2 C -4.217956 -1.882110 -0.457578

3 C -4.920581 -0.825207 0.123566

4 C -4.248288 0.298538 0.619263

5 C -2.862766 0.352859 0.499555

6 C -2.148408 -0.691064 -0.127687

7 N -2.004579 1.361874 1.021592

8 C -0.701922 -0.217380 -0.281415

9 C -0.657175 0.756057 0.947521

10 H -2.041049 2.236745 0.498436

11 C 0.482423 -1.180799 -0.135608

12 C 0.561906 1.687209 0.961576

13 C 1.841443 0.791473 0.795144

14 C 1.522502 -0.732000 0.900844

15 C -0.545317 0.275225 -1.766155

16 C 0.018091 -0.978410 -2.452727

17 N 1.157426 -1.302716 -1.517265

18 C 1.798442 -2.661689 -1.533251

19 C 2.807766 -1.586632 0.661213

20 C 2.535100 -2.871280 -0.179004

21 O 3.343840 -1.961688 1.935420

22 H 4.258765 -2.247684 1.792744

23 C 0.498126 2.866540 0.002019

24 O -0.514203 3.316832 -0.506776

25 O 1.707068 3.431517 -0.168924

26 C 1.741092 4.594919 -1.013245

27 H 1.408638 4.343118 -2.023430

28 H 2.782716 4.916279 -1.022029

29 H 1.096726 5.380778 -0.610446

30 C -0.498731 -0.126179 2.236878

31 C 0.827216 -0.938552 2.260891

32 O 2.147512 -0.388186 -1.756846

33 H -2.287787 -2.640480 -1.054213

34 H -4.751474 -2.760637 -0.809825

35 H -6.002030 -0.883682 0.215915

36 H -4.788586 1.103493 1.109506

37 H 0.132687 -2.187090 0.118605

38 H 0.586989 2.168136 1.950911

39 H 2.297754 0.971362 -0.173638

40 H 2.570074 1.036167 1.575594

41 H 0.195829 1.066080 -1.872465

42 H -1.492007 0.606944 -2.195851

43 H 0.450168 -0.810868 -3.438511

44 H -0.707810 -1.799177 -2.479024

45 H 1.034477 -3.434522 -1.687504

46 H 2.476569 -2.636193 -2.385396

47 H 3.522879 -0.967281 0.115621

48 H 1.961398 -3.557996 0.454310

49 H 3.495422 -3.363981 -0.371386

50 H -1.360516 -0.794431 2.308766

51 H -0.567121 0.552579 3.092965

52 H 1.491563 -0.601380 3.060651

53 H 0.632333 -2.000885 2.448918
